# Supplementary material for: Optimization-by-design of hepatotropic lipid nanoparticles targeting the sodium-taurocholate cotransporting polypeptide
Source: eLife. 2019 Jul 23;8:e42276. doi: 10.7554/eLife.42276 (PMC6682401; doi:10.7554/eLife.42276)
Supplement: Figure 1—source data 1. [file elife-42276-fig1-data1.xlsx]

## Sheet: Figure 1 Panel D
Input Data
	HeLa
relative MFI	PEG	N	0.2 µM	0.4 µM	0.8 µM	1.6 µM		preS2-48	N	0.2 µM	0.4 µM	0.8 µM	1.6 µM		Myr-preS2-48 A	N	0.2 µM	0.4 µM	0.8 µM	1.6 µM		Myr-preS2-31	N	0.2 µM	0.4 µM	0.8 µM	1.6 µM		Cap-preS2-48	N	0.2 µM	0.4 µM	0.8 µM	1.6 µM		Myr-preS2-48	N	0.2 µM	0.4 µM	0.8 µM	1.6 µM
(DiI)		1	1.91676	2.92442	3.47207	10.1533			1	2.00438	2.68346	3.72399	4.9069			1	2.01533	2.71632	3.72399	4.9069			1	2.13192	2.6384	3.15665	4.32273			1	1.47864	1.97152	2.55203	3.93209			1	1.84009	2.12486	2.77108	3.7678
		2	1.92017	2.94498	3.54908	10.1834			2	2.03883	2.70766	3.75405	4.95146			2	2.04962	2.7616	3.7972	5.00539			2	2.17241	2.71264	3.27586	4.44828			2	1.49946	1.97411	2.57821	3.92665			2	1.84466	2.14671	2.78317	3.74326
		3	1.98031	3.06891	3.70585	10.8743			3	2.09612	2.90677	4.01853	5.3619			3	2.13086	2.87203	4.03011	5.26925			3	2.18249	2.7127	3.26757	4.47596			3	1.5634	2.08454	2.67516	4.2154			3	1.93399	2.23509	2.92994	4.05327
		4	1.86101	3.15665	6.46643	14.3698
		5	1.85057	3.17241	6.48276	14.4943
		6	1.8619	3.21825	6.47349	14.5869
	HepG2 WT
relative MFI	PEG	N	0.2 µM	0.4 µM	0.8 µM	1.6 µM		preS2-48	N	0.2 µM	0.4 µM	0.8 µM	1.6 µM		Myr-preS2-48 A	N	0.2 µM	0.4 µM	0.8 µM	1.6 µM		Myr-preS2-31	N	0.2 µM	0.4 µM	0.8 µM	1.6 µM		Cap-preS2-48	N	0.2 µM	0.4 µM	0.8 µM	1.6 µM		Myr-preS2-48	N	0.2 µM	0.4 µM	0.8 µM	1.6 µM
(DiI)		1	1.16491	1.25146	1.4386	1.74269			1	1.14503	1.29825	1.45029	3.83626			1	1.78947	5.28655	7.53216	10.7135			1	2.77174	3.58696	4.90217	6.59783			1	1.90745	2.48307	3.52144	4.87585			1	2.8655	3.87135	5.20468	6.43275
		2	1.18511	1.31096	1.56266	1.99266			2	1.17462	1.33193	1.63608	1.99266			2	4.83482	6.42895	10.6345	15.1862			2	2.88575	3.69847	5.20612	6.89046			2	2.01149	2.70115	3.89655	5.35632			2	3.43996	4.96067	6.95333	8.48453
		3	1.24296	1.40289	1.72125	2.4067			3	1.2658	1.46535	1.82788	2.46763			3	6.06245	9.00228	13.1912	18.9185			3	3.04485	3.96715	5.52116	7.55527			3	2.24221	3.05755	4.53237	6.45084			3	4.08225	5.97106	8.65194	10.8302
		4	1.22563	1.35933	1.60446	2.039			4	1.23677	1.39276	1.69359	2.93036			4	4.66852	5.8273	7.63231	8.96936																	4	3.3649	4.66852	6.65181	7.59889
		5	1.21808	1.42324	1.67862	2.25251			5	1.24964	1.46341	1.7934	5.75323			5	8.02009	6.81492	8.92396	11.033																	5	3.81636	5.48063	8.19225	9.11047
		6	1.12867	1.17381	1.2754	1.56885			6	1.03047	1.04628	1.19639	1.4447			6	3.95034	5.37246	7.41535	9.67269																	6	3.09255	4.00677	4.80813	6.46727
		7	1.11494	1.14943	1.31034	1.63218			7	1.04943	1.08161	1.22989	1.57471			7	4.42529	5.97701	8.17241	10.9885																	7	3.32184	4.45977	5.42529	7.24138
		8	1.07794	1.14628	1.34293	1.73861			8	1.06235	1.1283	1.31894	1.66667			8	5.2518	7.03837	9.84412	13.1055																	8	3.80096	5.28777	6.36691	8.60911
		9	1.22826	1.40217	1.67391	2.53261
		10	1.24853	1.40165	1.71967	2.66196
		11	1.26342	1.4403	1.78143	2.8048
	HepG2 hNTCP
relative MFI	PEG	N	0.2 µM	0.4 µM	0.8 µM	1.6 µM		preS2-48	N	0.2 µM	0.4 µM	0.8 µM	1.6 µM		Myr-preS2-48 A	N	0.2 µM	0.4 µM	0.8 µM	1.6 µM		Myr-preS2-31	N	0.2 µM	0.4 µM	0.8 µM	1.6 µM		Cap-preS2-48	N	0.2 µM	0.4 µM	0.8 µM	1.6 µM		Myr-preS2-48	N	0.2 µM	0.4 µM	0.8 µM	1.6 µM
(DiI)		1	1.06407	1.11327	1.21281	1.32723			1	1.10069	1.15561	1.25858	1.45309			1	2.99771	4.1762	5.8238	7.83753			1	4.2471	6.16657	7.58963	7.63376			1	3.70115	8.68966	14.9425	33			1	6.12644	10	17.8391	33.1034
		2	1.07605	1.10897	1.20318	1.35074			2	1.11124	1.18048	1.29398	1.50965			2	3.1101	4.41544	6.1294	8.44495			2	4.4913	6.51555	7.97048	8.097			2	3.918	9.15718	15.5467	34.123			2	6.42369	10.8542	18.3827	35.615
		3	1.02535	1.03466	1.15882	1.27263			3	1.05535	1.14847	1.25194	1.45887			3	3.11433	4.35592	6.21831	8.36006			3	4.40106	6.69129	8.32718	8.32718			3	4.05183	9.46996	16.1837	36.1602			3	6.66667	11.0601	19.1284	37.1614
		4	1.11835	1.16178	1.23779	1.37894			4	1.07383	1.15092	1.22693	1.40065			4	2.17155	2.83388	3.53963	4.2671			4	3.6035	5.58598	8.4885	11.3691			4	3.53779	7.88609	14.7317	31.2486			4	4.30449	7.02081	18.4556	31.3472
		5	1.08262	1.16646	1.23937	1.36087			5	1.10328	1.13123	1.25152	1.40948			5	2.26002	2.89186	3.73026	4.4593			5	3.86337	5.85395	9.04594	11.861			5	3.83981	8.32744	15.5006	31.9081			5	4.5583	7.44405	19.788	34.2285
		6	1.0866	1.10314	1.24655	1.43409			6	1.03333	1.04943	1.11494	1.21839			6	2.32184	3.22989	4.34483	5.71264			6	2.81707	3.85739	4.96786	6.59264										6	3.76388	6.07832	9.74868	20.4208
		7	1.07538	1.11755	1.26516	1.46547			7	1.03986	1.05581	1.10478	1.24146			7	2.3918	3.40547	4.55581	6.04784
		8	1.09763	1.09763	1.25594	1.48813			8	1.02473	1.05889	1.10836	1.22497			8	2.43816	3.49823	4.71143	6.25442
		9	1.06552	1.08161	1.13218	1.22989										9	2.74918	3.94304	5.90361	7.98467
		10	1.07175	1.08884	1.13895	1.27563										10	2.95642	4.14605	6.12485	8.53946
		11	1.07538	1.07538	1.14252	1.26031										11	2.33781	3.57686	5.00292	6.86148
		12	1.1172	1.16101	1.31435	1.73056
		13	1.14252	1.21319	1.33098	1.77856
		14	1.06721	1.15137	1.2858	1.65985

## Sheet: Figure 1–figure supplement 1
Input Data
G(t) normalized	Atto488	Myr-preS2-48-Atto488	Myr-preS2-48-Atto488 virus-mimetic
0.2	1	1	1
0.4	1.03742	0.94256	0.99402
0.6	0.97516	0.92224	0.99284
0.8	1.01362	0.92998	0.97123
1	0.88601	0.90456	0.97319
1.2	0.84842	0.89996	0.98046
1.4	0.99965	0.88815	0.97217
1.6	0.96817	0.88129	0.97004
1.8	0.95965	0.88723	0.96945
2	0.9402	0.89457	0.96189
2.2	0.925	0.89936	0.95415
2.4	0.91316	0.88113	0.96464
2.6	0.84937	0.85293	0.96282
2.8	0.86196	0.82209	0.96172
3	0.8522	0.82704	0.95122
3.2	0.79366	0.80897	0.94936
3.6	0.74828	0.83758	0.9448
4	0.76348	0.79506	0.9505
4.4	0.81479	0.81246	0.95013
4.8	0.65772	0.7746	0.94624
5.2	0.73618	0.77249	0.94418
5.6	0.7505	0.74794	0.93779
6	0.67511	0.74234	0.93365
6.4	0.70633	0.72934	0.93427
7.2	0.68666	0.71132	0.93101
8	0.61669	0.70713	0.92522
8.8	0.58311	0.69274	0.92453
9.6	0.63043	0.68403	0.91889
10.4	0.60467	0.6602	0.91339
11.2	0.5417	0.64403	0.90665
12	0.58153	0.62305	0.89914
12.8	0.55496	0.60796	0.89544
14.4	0.51662	0.58662	0.88997
16	0.50894	0.5683	0.88653
17.6	0.50018	0.5529	0.88023
19.2	0.44358	0.54544	0.87659
20.8	0.45568	0.51625	0.86987
22.4	0.41763	0.49263	0.85923
24	0.38856	0.47825	0.85371
25.6	0.36769	0.45147	0.84744
28.8	0.364	0.4397	0.84036
32	0.32413	0.41755	0.83463
35.2	0.33391	0.40944	0.82984
38.4	0.33445	0.39578	0.82418
41.6	0.29389	0.36937	0.81182
44.8	0.28084	0.34469	0.80607
48	0.24766	0.32874	0.79423
51.2	0.24266	0.31096	0.7869
57.6	0.22419	0.29777	0.77646
64	0.1981	0.28061	0.77141
70.4	0.19554	0.26405	0.76433
76.8	0.19012	0.26257	0.75632
83.2	0.16748	0.23757	0.74239
89.6	0.14966	0.21851	0.73117
96	0.13389	0.20057	0.72062
102.4	0.12649	0.1887	0.71083
115.2	0.12562	0.18002	0.69962
128	0.1137	0.17292	0.68912
140.8	0.11122	0.15901	0.68068
153.6	0.09627	0.15387	0.67196
166.4	0.0891	0.13737	0.65613
179.2	0.08609	0.12493	0.64005
192	0.07703	0.11449	0.62488
204.8	0.0761	0.10767	0.61236
230.4	0.06693	0.09813	0.59837
256	0.06088	0.09332	0.58644
281.6	0.05748	0.08636	0.57491
307.2	0.05603	0.08317	0.5638
332.8	0.05163	0.07357	0.5424
358.4	0.04413	0.06554	0.52502
384	0.03898	0.06155	0.50755
409.6	0.0379	0.05471	0.49117
460.8	0.03197	0.05223	0.47646
512	0.02971	0.04702	0.4626
563.2	0.02748	0.04538	0.44969
614.4	0.02514	0.04155	0.43697
665.6	0.02176	0.03567	0.4154
716.8	0.02077	0.03217	0.39462
768	0.01751	0.0296	0.37687
819.2	0.01742	0.028	0.35993
921.6	0.01634	0.02438	0.34462
1024	0.01495	0.02219	0.33055
1126.4	0.01095	0.02186	0.31818
1228.8	0.0133	0.01911	0.30727
1331.2	0.01	0.01632	0.28638
1433.6	0.00712	0.01488	0.26731
1536	0.00833	0.01242	0.25208
1638.4	0.00634	0.01149	0.23777
1843.2	0.00609	0.01027	0.2257
2048	0.00441	0.00928	0.21374
2252.8	0.00564	0.00889	0.20312
2457.6	0.00502	0.00845	0.19366
2662.4	0.002	0.00858	0.17682
2867.2	0.00327	0.00648	0.16253
3072	0.00237	0.00763	0.15091
3276.8	0.00215	0.00778	0.14013
3686.4	0.00278	0.00593	0.1306
4096	0.00208	0.00491	0.12112
4505.6	0.00284	0.00357	0.11329
4915.2	0.00155	0.0047	0.10659
5324.8	0.000701722	0.00359	0.09696
5734.4	0.00231	0.00378	0.08906
6144	0.00107	0.00298	0.08292
6553.6	0.000847854	0.00217	0.08073
7372.8	0.00171	0.00202	0.07732
8192	-0.000179934	0.00228	0.07325
9011.2	-0.000367016	0.00025719	0.06924
9830.4	0.000938706	0.000935781	0.06598
10649.6	0.000403591	0.00117	0.06126
11468.8	0.000704807	0.00045843	0.05687
12288	0.00086451	0.000431977	0.052
13107.2	-9.07256e-05	0.000369027	0.04979
14745.6	-0.000193944	0.000591318	0.04721
16384	-0.000336501	0.00107	0.04544
18022.4	-0.000746499	0.000542356	0.04493
19660.8	0.000520237	0.000541544	0.04115
21299.2	-4.40099e-05	0.00068101	0.03325
22937.6	-0.000251971	0.000348424	0.0339
24576	-0.000419152	-7.74888e-05	0.03346
26214.4	-0.000266866	0.000173787	0.033
29491.2	-2.00788e-05	-0.000150203	0.03004
32768	0.000152277	-1.56977e-06	0.02731
36044.8	0.000529383	4.45236e-05	0.02477
39321.6	2.39563e-05	3.66934e-05	0.02478
42598.4	0.000344459	-2.2986e-06	0.02137
45875.2	0.000110189	-0.000349162	0.01835
49152	7.37572e-06	-0.000392621	0.0191
52428.8	-0.000119647	0.000219703	0.01906
58982.4	-0.000235787	0.000167573	0.01475
65536	-0.00011319	0.000120602	0.01496
72089.6	-9.32797e-05	0.000337352	0.01162
78643.2	-0.000175382	0.000483696	0.0124
85196.8	0.000125817	0.000253126	0.01194
91750.4	6.63731e-05	-2.44997e-05	0.01039
98304	4.94131e-05	-0.000107249	0.00954
104858	-0.000394816	0.000171741	0.00782
117965	-0.000382543	-8.22916e-05	0.00489
131072	-0.000338364	0.000253771	0.0049
144179	-0.000293756	0.000524668	0.00166
157286	0.000232533	0.000177777	0.00233
170394	-0.000130184	2.21263e-05	0.00286
183501	-0.00019235	3.00873e-06	0.00282
196608	-0.000361368	0.000134673	0.00195
209715	-6.52604e-05	-0.000269543	0.00324
235930	-2.25908e-05	0.00018727	0.00213
262144	-0.000121282	-7.85914e-05	0.00283
288358	-0.000235534	0.00014583	0.00040547
314573	-0.000244486	3.27036e-05	0.00241
340787	2.03654e-05	-0.000101951	0.000903465
367002	-6.86153e-06	1.22966e-05	-0.00101
393216	1.93876e-05	3.71233e-05	-0.00117
419430	-0.000149133	-5.49234e-05	-0.000292178
471859	-0.000138436	0.000145681	0.000911328
524288	-8.45974e-05	-0.000185084	0.00218
576717	-0.000126112	-1.13061e-06	0.00272
629146	-0.000109363	1.42775e-05	0.00403
681574	-9.66177e-05	-0.000292707	0.0024
734003	-0.000155514	-0.000279859	0.00155
786432	-0.000125699	-5.2279e-05	0.00224
838861	-9.00006e-05	0.000126077	0.000625559
943718	-0.000101212	3.0704e-05	0.000890814
1048580	-0.000101481	-4.75884e-05	0.000258023
1153430	-0.000120296	-0.000150081	0.000422199
1258290	1.46671e-06	-7.1434e-05	0.000367151
1363150	-7.83849e-05	0.000112528	0.000308974
1468010	-0.000205762	8.52162e-06	0.000371733
1572860	-6.03039e-05	-0.000138916	0.00121
1677720	-0.000181097	-6.45195e-05	0.00152
1887440	-0.000212825	-0.000150679	0.00114
2097150	-0.000261396	-0.00025207	-0.000401406
2306870	-0.000141344	-5.43347e-05	-0.00172
2516580	0	0	0

## Sheet: Figure 1–figure supplement 2
Input Data
	HeLa
Cell Viability	PEG	N	0.25 mM	0.5 mM	1 mM	2 mM	4 mM	8 mM		preS2-48	N	0.25 mM	0.5 mM	1 mM	2 mM	4 mM	8 mM		Myr-preS2-48 A	N	0.25 mM	0.5 mM	1 mM	2 mM	4 mM	8 mM		Myr-preS2-31	N	0.25 mM	0.5 mM	1 mM	2 mM	4 mM	8 mM		Cap-preS2-48	N	0.25 mM	0.5 mM	1 mM	2 mM	4 mM	8 mM		Myr-preS2-48	N	0.25 mM	0.5 mM
(%)		1	99.1952	108.613	99.1314	94.7361	98.7274	105.338			1	94.9454	108.532	97.7769	92.9671	97.0031	101.873			1	98.7627	108.887	98.0131	91.5236	95.5591	96.4919			1	98.0962	98.258	101.611	104.297	94.8588	95.6349			1	104.407	104.665	100.908	101.635	99.9499	96.6048			1	100.043	111.359
		2	102.226	104.186	92.6044	97.9014	96.9672	98.5761			2	99.4389	103.417	91.9696	97.1728	100.16	99.9917			2	97.8701	99.2932	89.1944	95.294	96.8432	94.4724			2	99.324	96.243	105.136	101.523	99.7284	95.8875			2	103.458	105.337	102.006	101.795	99.5315	89.8842			2	100.836	103.175
		3	98.948	108.583	92.0772	98.3155	98.2527	97.6348			3	96.4222	105.976	91.8565	95.2542	99.4118	103.884			3	96.0787	96.8719	89.7086	93.0947	93.9452	93.5357			3	97.8847	96.2993	98.2198	96.4366	96.6693	96.0987			3	95.6723	96.7798	99.3886	101.668	100.265	96.334			3	97.1627	100.573
	HepG2 WT
Cell Viability	PEG	N	0.25 mM	0.5 mM	1 mM	2 mM	4 mM	8 mM		preS2-48	N	0.25 mM	0.5 mM	1 mM	2 mM	4 mM	8 mM		Myr-preS2-48 A	N	0.25 mM	0.5 mM	1 mM	2 mM	4 mM	8 mM		Myr-preS2-31	N	0.25 mM	0.5 mM	1 mM	2 mM	4 mM	8 mM		Cap-preS2-48	N	0.25 mM	0.5 mM	1 mM	2 mM	4 mM	8 mM		Myr-preS2-48	N	0.25 mM	0.5 mM
(%)		1	98.1942	96.6626	93.4954	83.2045	100.468	83.8741			1	91.1343	87.7066	86.6084	83.1584	95.7003	76.9257			1	93.1116	98.9907	85.0007	79.6003	88.0254	66.8138			1	104.9	100.065	100.084	102.052	99.133	98.6414			1	102.952	101.887	101.926	100.191	98.0097	96.0357			1	102.75	108.977
		2	100.664	103.525	94.514	93.7231	96.44	90.9725			2	99.893	100.879	95.3674	93.0045	95.4877	91.7468			2	96.1864	93.5792	88.5468	79.0551	77.8362	73.3693			2	102.204	99.4006	100.241	99.7509	100.565	98.0215			2	102.678	97.554	102.458	97.0598	105.142	95.4595			2	95.9965	96.098
		3	101.621	104.046	97.168	91.278	94.2817	90.1501			3	100.488	102.5	94.4348	90.5564	91.4385	92.5792			3	94.02	87.6026	89.6115	75.3974	75.7686	77.751			3	101.405	103.171	98.8105	99.6356	101.877	103.592			3	96.8552	92.2551	96.7301	95.1926	91.0736	94.7132			3	94.3571	96.2452
	HepG2 hNTCP
Cell Viability	PEG	N	0.25 mM	0.5 mM	1 mM	2 mM	4 mM	8 mM		preS2-48	N	0.25 mM	0.5 mM	1 mM	2 mM	4 mM	8 mM		Myr-preS2-48 A	N	0.25 mM	0.5 mM	1 mM	2 mM	4 mM	8 mM		Myr-preS2-31	N	0.25 mM	0.5 mM	1 mM	2 mM	4 mM	8 mM		Cap-preS2-48	N	0.25 mM	0.5 mM	1 mM	2 mM	4 mM	8 mM		Myr-preS2-48	N	0.25 mM	0.5 mM
(%)		1	93.4583	105.779	96.9187	86.0489	102.845	98.7458			1	94.3318	96.2988	87.1934	89.3867	100.917	90.0516			1	93.8727	95.0318	84.2788	94.8597	94.7437	78.5493			1	99.9326	93.8808	93.2228	89.8723	93.0199	100.205			1	97.3167	106.097	104.682	100.327	98.2414	92.9991			1	98.3154	96.9872
		2	107.415	101.267	94.6106	102.387	96.7462	107.293			2	107.045	92.4766	89.7536	90.5097	99.4886	96.9637			2	107.386	90.4475	93.1946	90.1026	96.4909	98.8407			2	95.8718	92.5129	92.7645	85.6427	92.7798	93.1959			2	97.5006	96.5564	97.859	97.1232	97.6058	88.0284			2	103.154	93.0967
		3	95.242	102.728	93.2716	101.017	108.983	106.496			3	94.0059	94.6808	88.896	90.1054	100.045	95.7419			3	95.8911	89.8412	89.7879	86.809	91.0223	97.9915			3	99.3352	104.276	98.2794	98.7535	103.072	100.605			3	96.3617	88.7237	92.8748	96.0275	87.7372	88.6422			3	94.4304	90.2889
[truncated: 4 more columns]

## Sheet: Figure 1–figure supplement 3
Input Data
c CF [mM]	PBS	5e-05	0.0001	0.001	0.005	0.01	0.05	0.1	0.5	1	3	15	30	60
Fluorescence [a.u.]	4.177	626.198	1135.83	9860.47	41555.2	59890.4	85708.3	88763.2	93371.8	93126.4	92860.8	51455.7	12332.6	6.218
