# Supplementary material for: Optimization-by-design of hepatotropic lipid nanoparticles targeting the sodium-taurocholate cotransporting polypeptide
Source: eLife. 2019 Jul 23;8:e42276. doi: 10.7554/eLife.42276 (PMC6682401; doi:10.7554/eLife.42276)
Supplement: Figure 2—source data 1. [file elife-42276-fig2-data1.xlsx]

## Sheet: Figure 2 Panel B
Input Data
		PEG		preS2-48		Myr-preS2-48 A		Myr-preS2-31		Cap-preS2-48		Myr-preS2-48
relative MFI	N	Virus-mimetic	`+Myrcludex B	Virus-mimetic	`+Myrcludex B	Virus-mimetic	`+Myrcludex B	Virus-mimetic	`+Myrcludex B	Virus-mimetic	`+Myrcludex B	Virus-mimetic	`+Myrcludex B
(DiI)	1	1.32369	1.39043	1.39043	1.43493	7.54171	4.82759	8.16327	2.79095	15.6036	3.48519	18.3204	3.88209
	2	1.25749	1.30539	1.29341	1.34132	6.83832	4.53892	8.70849	2.85714	20.5809	3.3713	19.9162	3.66467
	3	1.61054	1.58126	1.65447	1.66911	6.23116	8.5798	9.1504	2.89182	15.4556	3.31435	15.603	6.28111
Descriptive Statistics OriginPro
		N Analysis	N Missing	Mean	Standard Deviation	SE of Mean
PEG	Virus-mimetic	3	0	1.39724	0.18767	0.10835
	`+Myrcludex B	3	0	1.42569	0.14127	0.08156
preS2-48	Virus-mimetic	3	0	1.4461	0.18685	0.10788
	`+Myrcludex B	3	0	1.48178	0.16884	0.09748
Myr-preS2-48 A	Virus-mimetic	3	0	6.8704	0.65587	0.37867
	`+Myrcludex B	3	0	5.9821	2.25429	1.30152
Myr-preS2-31	Virus-mimetic	3	0	8.67405	0.49447	0.28548
	`+Myrcludex B	3	0	2.84664	0.05125	0.02959
Cap-preS2-48	Virus-mimetic	3	0	17.2134	2.91728	1.68429
	`+Myrcludex B	3	0	3.39028	0.08699	0.05022
Myr-preS2-48	Virus-mimetic	3	0	17.9465	2.18074	1.25905
	`+Myrcludex B	3	0	4.60929	1.45192	0.83826

## Sheet: Figure 2 Panel D
Input Data							Descriptive Statistics OriginPro
		0.1 mM lipid
relative MFI	N	PEG	0.125 mol%	0.25 mol%	0.5 mol%		0.1 mM lipid	N Analysis	N Missing	Mean	Standard Deviation	SE of Mean
(CF)	1	1.04752	1.04752	1.62753	2.59967		PEG	4	0	1.05898	0.05835	0.02918
	2	0.98198	0.96996	1.49645	2.47952		0.125 mol%	4	0	1.16248	0.18082	0.09041
	3	1.11415	1.33261	2.17368	3.01475		0.25 mol%	4	0	1.84872	0.33683	0.16842
	4	1.0923	1.29984	2.09721	3.00382		0.5 mol%	4	0	2.77444	0.27561	0.13781
		0.2 mM lipid
relative MFI	N	PEG	0.125 mol%	0.25 mol%	0.5 mol%		0.2 mM lipid	N Analysis	N Missing	Mean	Standard Deviation	SE of Mean
(CF)	1	1.03768	1.02458	1.95522	4.01966		PEG	4	0	1.0396	0.05819	0.02909
	2	0.95904	0.99399	1.84599	3.81212		0.125 mol%	4	0	1.21737	0.24064	0.12032
	3	1.0923	1.43091	2.59967	4.87165		0.25 mol%	4	0	2.25014	0.40607	0.20303
	4	1.06936	1.41999	2.59967	4.80612		0.5 mol%	4	0	4.37739	0.54025	0.27012
		0.4 mM lipid
relative MFI	N	PEG	0.125 mol%	0.25 mol%	0.5 mol%		0.4 mM lipid	N Analysis	N Missing	Mean	Standard Deviation	SE of Mean
(CF)	1	1.03768	1.04752	2.47952	6.16057		PEG	4	0	1.07045	0.06614	0.03307
	2	0.99399	0.99399	2.34844	5.94211		0.125 mol%	4	0	1.33233	0.36047	0.18024
	3	1.13599	1.64937	3.76843	8.25778		0.25 mol%	4	0	3.06936	0.7595	0.37975
	4	1.11415	1.63845	3.68105	7.98471		0.5 mol%	4	0	7.08629	1.20356	0.60178
		0.5 mM lipid
relative MFI	N	PEG	0.125 mol%	0.25 mol%	0.5 mol%		0.5 mM lipid	N Analysis	N Missing	Mean	Standard Deviation	SE of Mean
(CF)	1	1.07919	1.01584	3.59366	9.95085		PEG	4	0	1.09448	0.06025	0.03013
	2	1.01584	0.96996	3.34244	9.645		0.125 mol%	4	0	1.41944	0.49297	0.24648
	3	1.14691	1.85691	5.82196	14.4184		0.25 mol%	4	0	4.574	1.28639	0.6432
	4	1.13599	1.83506	5.53796	14.036		0.5 mol%	4	0	12.0126	2.56504	1.28252

## Sheet: Figure 2–figure supplement 2
Input Data							Descriptive Statistics OriginPro
CF/DiI positive cells (%)	N	PBS Ctrl	pEF Ctrl	mNTCP	hNTCP			N Analysis	N Missing	Mean	Standard Deviation	SE of Mean
	1	1.22	6.65	22.5	18.2		PBS Ctrl	3	0	1.26	0.17349	0.10017
	2	1.11	6.68	22.2	19.8		pEF Ctrl	3	0	6.93667	0.47078	0.2718
	3	1.45	7.48	24.2	21.3		mNTCP	3	0	22.9667	1.07858	0.62272
							hNTCP	3	0	19.7667	1.55027	0.89505

## Sheet: Figure 2–figure supplement 4
Input Data
		PEG		Myr-preS2-48 A		Myr-preS2-48
relative MFI	N	Virus-mimetic	`+Heparan Sulfate	Virus-mimetic	`+Heparan Sulfate	Virus-mimetic	`+Heparan Sulfate
(DiI)	1	0.98999	1.08161	11.8965	5.68966	7.45977	4.5977
	2	1	1.08161	13.5632	6.42529	8.45977	5.25287
	3	1.00501	1.04901	13.769	6.52275	8.52975	5.28588
Descriptive Statistics OriginPro
		N Analysis	N Missing	Mean	Standard Deviation	SE of Mean
PEG	Virus-mimetic	3	0	0.99833	0.00765	0.00441
	`+Heparan Sulfate	3	0	1.07074	0.01882	0.01087
Myr-preS2-48 A	Virus-mimetic	3	0	13.0762	1.02681	0.59283
	`+Heparan Sulfate	3	0	6.21257	0.45547	0.26296
Myr-preS2-48	Virus-mimetic	3	0	8.14977	0.59858	0.34559
	`+Heparan Sulfate	3	0	5.04549	0.38814	0.22409
