# Supplementary material for: Optimization-by-design of hepatotropic lipid nanoparticles targeting the sodium-taurocholate cotransporting polypeptide
Source: eLife. 2019 Jul 23;8:e42276. doi: 10.7554/eLife.42276 (PMC6682401; doi:10.7554/eLife.42276)
Supplement: Figure 4—source data 1. [file elife-42276-fig4-data1.xlsx]

## Sheet: Figure 4 Panel A
Input Data							Descriptive Statistics OriginPro
Colocalization with HEK293	N	PEG	0.125 mol%	0.25 mol%	0.5 mol%			N Analysis	N Missing	Mean	Standard Deviation	SE of Mean
(Pearson`s Correlation Coefficient)	1	0.089	0.074	0.167	0.065		PEG	2	1	0.0775	0.01626	0.0115
	2	0.066	0.1	0.069	0.104		0.125 mol%	2	1	0.087	0.01838	0.013
	3			0.212	0.077		0.25 mol%	5	0	0.1614	0.056	0.02505
	4			0.199	0.068		0.5 mol%	4	0	0.0785	0.01775	0.00887
	5			0.16

## Sheet: Figure 4 Panel B
Input Data							Descriptive Statistics OriginPro
Colocalization with HEK293	N	PEG	0.125 mol%	0.25 mol%	0.5 mol%			N Analysis	N Missing	Mean	Standard Deviation	SE of Mean
(Pearson`s Correlation Coefficient)	1	0.089	0.188	0.64	0.061		PEG	3	0	0.09667	0.01415	0.00817
	2	0.113	0.157	0.707	0.183		0.125 mol%	3	0	0.15567	0.03302	0.01906
	3	0.088	0.122	0.248	0.036		0.25 mol%	4	0	0.46975	0.23731	0.11866
	4			0.284			0.5 mol%	3	0	0.09333	0.07865	0.04541
