# Supplementary material for: Optimization-by-design of hepatotropic lipid nanoparticles targeting the sodium-taurocholate cotransporting polypeptide
Source: eLife. 2019 Jul 23;8:e42276. doi: 10.7554/eLife.42276 (PMC6682401; doi:10.7554/eLife.42276)
Supplement: Figure 5—source data 1. [file elife-42276-fig5-data1.xlsx]

## Sheet: Figure 5 Panel B
Input Data
Organ/Tissue	N	PEG	0.125 mol%	0.25 mol%	0.5 mol%
Blood	1	60.5286	41.0256	17.3448	8.3754
	2	62.5878	50.5494	8.8308	7.9002
	3	60.786	41.9364	11.187	8.91
	4	60.0336	58.1526	9.2268	6.2172
Heart	1	1.788	1.5615	0.3285	0.8775
	2	0.906	0.8925	0.4305	0.597
	3	0.8715	1.5495	0.3285	1.4955
	4	1.9395	1.0695	0.6435	0.666
Lung	1	1.4238	1.4472	3.0276	0.4914
	2	1.2348	1.5678	0.5076	0.6138
	3	1.5084	1.7838	1.5588	0.6804
	4	1.7208	1.8396	0.342	0.5922
Liver	1	7.5199	10.3277	17.1665	11.259
	2	8.8404	11.9679	22.3095	24.742
	3	8.0342	11.8706	14.4004	21.8647
	4	7.2975	12.0791	41.6166	10.3972
Spleen	1	0.4635	7.0317	18.1458	17.6337
	2	0.5247	5.2524	22.7934	18.8532
	3	0.4329	6.9966	18.1071	25.2549
	4	0.5472	9.9702	14.5422	30.4875
Kidney	1	2.2192	1.5998	0.684	1.4174
	2	2.9678	3.8646	0.798	2.9336
	3	2.3256	1.7594	0.8436	1.9152
	4	3.1008	2.9526	1.1818	0.7486
