# Supplementary material for: Optimization-by-design of hepatotropic lipid nanoparticles targeting the sodium-taurocholate cotransporting polypeptide
Source: eLife. 2019 Jul 23;8:e42276. doi: 10.7554/eLife.42276 (PMC6682401; doi:10.7554/eLife.42276)
Supplement: Figure 6—source data 1. [file elife-42276-fig6-data1.xlsx]

## Sheet: Figure 6 Panel C
Input Data						Descriptive Statistics OriginPro
Colocalization with mNtcp	N	Nucleus	Myr-preS2-31	Nanocarrier			N Analysis	N Missing	Mean	Standard Deviation	SE of Mean
(Pearson`s Correlation Coefficient)	1	0.006	0.264	0.041		Nucleus	3	0	0.00733	0.00416	0.0024
	2	0.012	0.341	0.235		Myr-preS2-31	3	0	0.283	0.05122	0.02957
	3	0.004	0.244	0.053		Nanocarrier	3	0	0.10967	0.10871	0.06276
