# Supplementary material for: Optimization-by-design of hepatotropic lipid nanoparticles targeting the sodium-taurocholate cotransporting polypeptide
Source: eLife. 2019 Jul 23;8:e42276. doi: 10.7554/eLife.42276 (PMC6682401; doi:10.7554/eLife.42276)
Supplement: Table 1—source data 1. [file elife-42276-table1-data1.xlsx]

## Sheet: Table 1
Input Data
Physicochemical Characterization
PEG	N	size [nm]	PDI	Zeta potential [mV]
	1	87.7	0.049	-6.08
	2	84.7	0.05	-5.23
	3	92.6	0.042	-6.47
	4	91.3	0.054
	5	80.8	0.051
	6	81.6	0.07
	7	85.5	0.023
	8	96.6	0.059
	9	96	0.052
preS2-48	N	size [nm]	PDI	Zeta potential [mV]
	1	88.4	0.032	-4.61
	2	96.4	0.072	-1.87
	3	96.6	0.069	-3.53
	4	96.8	0.083
	5	82.2	0.058
	6	87.7	0.092
	7	87.1	0.029
Myr-preS2-48 A	N	size [nm]	PDI	Zeta potential [mV]
	1	90.7	0.004	-16.89
	2	94.6	0.075	-11.91
	3	95.4	0.129	-11.26
	4	93.7	0.098
	5	81.5	0.058
	6	86.7	0.035
	7	86.4	0.044
	8	96.4	0.086
	9	91.5	0.011
Myr-preS2-31	N	size [nm]	PDI	Zeta potential [mV]
	1	87.1	0.086	-10.81
	2	84	0.121	-9.51
	3	85.8	0.105	-9.15
	4	86.2	0.091
	5	92.5	0.117
	6	92.4	0.114
	7	95.7	0.069
Cap-preS2-48	N	size [nm]	PDI	Zeta potential [mV]
	1	120.6	0.22	-9.43
	2	124.1	0.223	-7.19
	3	132.2	0.247	-8.55
	4	195.3	0.293
	5	99.2	0.201
Myr-preS2-48	N	size [nm]	PDI	Zeta potential [mV]
	1	93	-0.061	-15.46
	2	80.6	0.108	-9.35
	3	94.6	0.154	-7.29
	4	95	0.173
	5	94.5	0.192
	6	88.5	0.137
	7	83.8	0.098
	8	97.8	0.071
	9	102.1	0.184
